# Supplementary material
Source: publisher figshare collection journal article supplement (https://acs.figshare.com/ndownloader/files/4503499)
Supplement: Supplementary file 1 [file 4503499]

 
data_asapip11

_audit_creation_method           SHELXL-97
_chemical_name_systematic        
;
 ?
;
_chemical_name_common            ?
_chemical_melting_point          ?
_chemical_formula_moiety         'C7 H6 N O3, C4 H11 N2'
_chemical_formula_sum            'C11 H17 N3 O3'
_chemical_formula_weight         239.28

loop_
_atom_type_symbol
_atom_type_description
_atom_type_scat_dispersion_real
_atom_type_scat_dispersion_imag
_atom_type_scat_source
C C 0.0033 0.0016 'International Tables Vol C Tables 4.2.6.8 and 6.1.1.4'
H H 0.0000 0.0000 'International Tables Vol C Tables 4.2.6.8 and 6.1.1.4'
N N 0.0061 0.0033 'International Tables Vol C Tables 4.2.6.8 and 6.1.1.4'
O O 0.0106 0.0060 'International Tables Vol C Tables 4.2.6.8 and 6.1.1.4'

_symmetry_cell_setting           Monoclinic
_symmetry_space_group_name_H-M   P21/c

loop_
_symmetry_equiv_pos_as_xyz
'x, y, z'
'-x, y+1/2, -z+1/2'
'-x, -y, -z'
'x, -y-1/2, z-1/2'

_cell_length_a                   10.3122(12)
_cell_length_b                   7.6976(8)
_cell_length_c                   15.4938(18)
_cell_angle_alpha                90.00
_cell_angle_beta                 101.915(8)
_cell_angle_gamma                90.00
_cell_volume                     1203.4(2)
_cell_formula_units_Z            4
_cell_measurement_temperature    150(2)
_cell_measurement_reflns_used    3697
_cell_measurement_theta_min      2.69
_cell_measurement_theta_max      30.66

_exptl_crystal_description       plate
_exptl_crystal_colour            colourless
_exptl_crystal_size_max          0.18
_exptl_crystal_size_mid          0.06
_exptl_crystal_size_min          0.04

_exptl_crystal_density_meas      'not measured'
_exptl_crystal_density_diffrn    1.321
_exptl_crystal_density_method    'not measured'
_exptl_crystal_F_000             512
_exptl_absorpt_coefficient_mu    0.098

_exptl_absorpt_correction_type   none
_exptl_absorpt_correction_T_min  ?
_exptl_absorpt_correction_T_max  ?
_exptl_absorpt_process_details   ?

_exptl_special_details           
;
 ?
;

_diffrn_ambient_temperature      150(2)


_diffrn_radiation_wavelength     0.71069
_diffrn_radiation_type           MoK\a
_diffrn_radiation_source         'fine-focus sealed tube'
_diffrn_radiation_monochromator  graphite
_diffrn_measurement_device_type  'Bruker APEX-II CCD area detector'
_diffrn_measurement_method       'phi and omega scans'
_diffrn_detector_area_resol_mean ?
_diffrn_standards_number         ?
_diffrn_standards_interval_count ?
_diffrn_standards_interval_time  ?
_diffrn_standards_decay_%        ?
_diffrn_reflns_number            21114
_diffrn_reflns_av_R_equivalents  0.0488
_diffrn_reflns_av_sigmaI/netI    0.0395
_diffrn_reflns_limit_h_min       -14
_diffrn_reflns_limit_h_max       14
_diffrn_reflns_limit_k_min       -8
_diffrn_reflns_limit_k_max       11
_diffrn_reflns_limit_l_min       -22
_diffrn_reflns_limit_l_max       22
_diffrn_reflns_theta_min         2.69
_diffrn_reflns_theta_max         30.66
_reflns_number_total             3697
_reflns_number_gt                2569
_reflns_threshold_expression     >2\s(I)


_computing_data_collection       'BRUKER APEX2 (Bruker, 2005)'
_computing_cell_refinement       'BRUKER SMART (Bruker, 2005)'
_computing_data_reduction        'BRUKER SAINT (Bruker, 2005)'
_computing_structure_solution    'SIR 97 (Altomare et al, 1999)'
_computing_structure_refinement  'SHELXL-97 (Sheldrick, 2008)'
_computing_molecular_graphics    'ORTEP 3.2 (Farrugia, 1997) and Mercury 2.2'
_computing_publication_material  ?

_refine_special_details          
;
 Refinement of F^2^ against ALL reflections.  The weighted R-factor wR and
 goodness of fit S are based on F^2^, conventional R-factors R are based
 on F, with F set to zero for negative F^2^. The threshold expression of
 F^2^ > 2\s(F^2^) is used only for calculating R-factors(gt) etc. and is
 not relevant to the choice of reflections for refinement.  R-factors based
 on F^2^ are statistically about twice as large as those based on F, and R-
 factors based on ALL data will be even larger.
;

_refine_ls_structure_factor_coef Fsqd
_refine_ls_matrix_type           full
_refine_ls_weighting_scheme      calc
_refine_ls_weighting_details     
'calc w=1/[\s^2^(Fo^2^)+(0.0714P)^2^+0.0368P] where P=(Fo^2^+2Fc^2^)/3'
_atom_sites_solution_primary     direct
_atom_sites_solution_secondary   difmap
_atom_sites_solution_hydrogens   geom
_refine_ls_hydrogen_treatment    mixed
_refine_ls_extinction_method     none
_refine_ls_extinction_coef       ?
_refine_ls_number_reflns         3697
_refine_ls_number_parameters     174
_refine_ls_number_restraints     0
_refine_ls_R_factor_all          0.0788
_refine_ls_R_factor_gt           0.0498
_refine_ls_wR_factor_ref         0.1304
_refine_ls_wR_factor_gt          0.1202
_refine_ls_goodness_of_fit_ref   1.037
_refine_ls_restrained_S_all      1.037
_refine_ls_shift/su_max          0.000
_refine_ls_shift/su_mean         0.000

loop_
_atom_site_label
_atom_site_type_symbol
_atom_site_fract_x
_atom_site_fract_y
_atom_site_fract_z
_atom_site_U_iso_or_equiv
_atom_site_adp_type
_atom_site_occupancy
_atom_site_symmetry_multiplicity
_atom_site_calc_flag
_atom_site_refinement_flags
_atom_site_disorder_assembly
_atom_site_disorder_group
O1 O 0.46739(9) 0.13989(13) 0.27293(6) 0.0324(3) Uani 1 1 d . . .
H1 H 0.4951 0.1606 0.2281 0.049 Uiso 1 1 calc R . .
O2 O 0.46290(10) 0.25865(13) 0.12024(6) 0.0320(2) Uani 1 1 d . . .
O3 O 0.29465(10) 0.42185(13) 0.05118(6) 0.0308(2) Uani 1 1 d . . .
N1 N 0.10102(13) 0.24174(19) 0.40645(8) 0.0343(3) Uani 1 1 d . . .
C1 C 0.28708(11) 0.31321(16) 0.19274(7) 0.0192(2) Uani 1 1 d . . .
C2 C 0.34755(12) 0.21544(17) 0.26707(8) 0.0209(3) Uani 1 1 d . . .
C3 C 0.28556(12) 0.19401(17) 0.33753(8) 0.0222(3) Uani 1 1 d . . .
H3 H 0.3273 0.1298 0.3862 0.027 Uiso 1 1 calc R . .
C4 C 0.16145(12) 0.26722(17) 0.33673(8) 0.0223(3) Uani 1 1 d . . .
C5 C 0.10083(12) 0.36625(18) 0.26316(8) 0.0248(3) Uani 1 1 d . . .
H5 H 0.0185 0.4169 0.2614 0.030 Uiso 1 1 calc R . .
C6 C 0.16385(12) 0.38788(17) 0.19381(8) 0.0229(3) Uani 1 1 d . . .
H6 H 0.1229 0.4547 0.1459 0.027 Uiso 1 1 calc R . .
C7 C 0.35171(13) 0.33440(17) 0.11634(8) 0.0231(3) Uani 1 1 d . . .
N2 N 0.13934(11) 0.89516(18) 0.03957(8) 0.0279(3) Uani 1 1 d . . .
N3 N 0.35723(10) 0.72738(15) -0.01856(7) 0.0225(2) Uani 1 1 d . . .
C8 C 0.26556(12) 0.86048(18) 0.09932(9) 0.0260(3) Uani 1 1 d . . .
H8A H 0.2609 0.7486 0.1273 0.031 Uiso 1 1 calc R . .
H8B H 0.2807 0.9482 0.1452 0.031 Uiso 1 1 calc R . .
C9 C 0.38167(12) 0.85985(19) 0.05286(9) 0.0279(3) Uani 1 1 d . . .
H9A H 0.3913 0.9737 0.0281 0.033 Uiso 1 1 calc R . .
H9B H 0.4629 0.8327 0.0947 0.033 Uiso 1 1 calc R . .
C10 C 0.23287(13) 0.7683(2) -0.08318(8) 0.0291(3) Uani 1 1 d . . .
H10A H 0.2158 0.6789 -0.1282 0.035 Uiso 1 1 calc R . .
H10B H 0.2423 0.8784 -0.1117 0.035 Uiso 1 1 calc R . .
C11 C 0.11795(12) 0.7780(2) -0.03612(9) 0.0305(3) Uani 1 1 d . . .
H11A H 0.0396 0.8156 -0.0780 0.037 Uiso 1 1 calc R . .
H11B H 0.1006 0.6624 -0.0163 0.037 Uiso 1 1 calc R . .
H12 H 0.1497(18) 0.192(2) 0.4492(12) 0.042(5) Uiso 1 1 d . . .
H11 H 0.0273(18) 0.293(2) 0.4059(11) 0.040(5) Uiso 1 1 d . . .
H15 H 0.4295(18) 0.727(2) -0.0465(12) 0.045(5) Uiso 1 1 d . . .
H14 H 0.3510(17) 0.617(2) 0.0051(12) 0.038(4) Uiso 1 1 d . . .
H13 H 0.1411(16) 0.993(2) 0.0261(11) 0.037(5) Uiso 1 1 d . . .

loop_
_atom_site_aniso_label
_atom_site_aniso_U_11
_atom_site_aniso_U_22
_atom_site_aniso_U_33
_atom_site_aniso_U_23
_atom_site_aniso_U_13
_atom_site_aniso_U_12
O1 0.0293(5) 0.0421(6) 0.0300(5) 0.0069(4) 0.0158(4) 0.0130(4)
O2 0.0376(5) 0.0349(6) 0.0299(5) -0.0011(4) 0.0219(4) 0.0002(4)
O3 0.0456(6) 0.0311(6) 0.0174(4) 0.0016(4) 0.0099(4) -0.0069(4)
N1 0.0280(6) 0.0531(9) 0.0261(6) 0.0086(6) 0.0158(5) 0.0067(6)
C1 0.0250(6) 0.0183(6) 0.0158(5) -0.0013(4) 0.0078(4) -0.0026(5)
C2 0.0218(5) 0.0216(6) 0.0209(6) -0.0008(5) 0.0082(4) 0.0003(5)
C3 0.0239(6) 0.0243(6) 0.0197(6) 0.0048(5) 0.0073(4) 0.0009(5)
C4 0.0219(5) 0.0272(7) 0.0196(6) -0.0022(5) 0.0088(4) -0.0043(5)
C5 0.0189(5) 0.0326(8) 0.0235(6) -0.0004(5) 0.0060(4) 0.0027(5)
C6 0.0256(6) 0.0248(7) 0.0175(5) 0.0011(5) 0.0025(4) -0.0003(5)
C7 0.0327(6) 0.0211(6) 0.0183(5) -0.0038(5) 0.0116(5) -0.0068(5)
N2 0.0242(5) 0.0268(7) 0.0358(6) -0.0039(5) 0.0133(5) 0.0048(5)
N3 0.0222(5) 0.0249(6) 0.0238(5) 0.0037(4) 0.0122(4) 0.0050(4)
C8 0.0262(6) 0.0289(7) 0.0259(6) -0.0052(5) 0.0122(5) -0.0018(5)
C9 0.0210(6) 0.0332(8) 0.0315(7) -0.0036(6) 0.0101(5) -0.0021(5)
C10 0.0296(6) 0.0364(8) 0.0220(6) 0.0009(5) 0.0067(5) 0.0098(6)
C11 0.0204(6) 0.0399(8) 0.0309(7) -0.0051(6) 0.0047(5) 0.0050(5)

_geom_special_details            
;
 All s.u.'s (except the s.u. in the dihedral angle between two l.s. planes)
 are estimated using the full covariance matrix.  The cell s.u.'s are taken
 into account individually in the estimation of s.u.'s in distances, angles
 and torsion angles; correlations between s.u.'s in cell parameters are only
 used when they are defined by crystal symmetry.  An approximate (isotropic)
 treatment of cell s.u.'s is used for estimating s.u.'s involving l.s. planes.
;

loop_
_geom_bond_atom_site_label_1
_geom_bond_atom_site_label_2
_geom_bond_distance
_geom_bond_site_symmetry_2
_geom_bond_publ_flag
O1 C2 1.3518(14) . ?
O1 H1 0.8200 . ?
O2 C7 1.2766(16) . ?
O3 C7 1.2543(16) . ?
N1 C4 1.3680(16) . ?
N1 H12 0.836(18) . ?
N1 H11 0.854(18) . ?
C1 C6 1.3980(17) . ?
C1 C2 1.4089(17) . ?
C1 C7 1.4825(16) . ?
C2 C3 1.3842(16) . ?
C3 C4 1.3961(17) . ?
C3 H3 0.9300 . ?
C4 C5 1.4060(18) . ?
C5 C6 1.3759(17) . ?
C5 H5 0.9300 . ?
C6 H6 0.9300 . ?
N2 C8 1.4576(17) . ?
N2 C11 1.4594(18) . ?
N2 H13 0.784(18) . ?
N3 C9 1.4875(17) . ?
N3 C10 1.4886(16) . ?
N3 H15 0.936(19) . ?
N3 H14 0.930(17) . ?
C8 C9 1.5191(18) . ?
C8 H8A 0.9700 . ?
C8 H8B 0.9700 . ?
C9 H9A 0.9700 . ?
C9 H9B 0.9700 . ?
C10 C11 1.5160(19) . ?
C10 H10A 0.9700 . ?
C10 H10B 0.9700 . ?
C11 H11A 0.9700 . ?
C11 H11B 0.9700 . ?

loop_
_geom_angle_atom_site_label_1
_geom_angle_atom_site_label_2
_geom_angle_atom_site_label_3
_geom_angle
_geom_angle_site_symmetry_1
_geom_angle_site_symmetry_3
_geom_angle_publ_flag
C2 O1 H1 109.5 . . ?
C4 N1 H12 113.2(12) . . ?
C4 N1 H11 118.4(12) . . ?
H12 N1 H11 127.2(17) . . ?
C6 C1 C2 117.38(10) . . ?
C6 C1 C7 121.60(11) . . ?
C2 C1 C7 121.02(11) . . ?
O1 C2 C3 117.42(11) . . ?
O1 C2 C1 121.93(10) . . ?
C3 C2 C1 120.65(11) . . ?
C2 C3 C4 121.11(11) . . ?
C2 C3 H3 119.4 . . ?
C4 C3 H3 119.4 . . ?
N1 C4 C3 120.09(12) . . ?
N1 C4 C5 121.27(12) . . ?
C3 C4 C5 118.65(11) . . ?
C6 C5 C4 119.74(11) . . ?
C6 C5 H5 120.1 . . ?
C4 C5 H5 120.1 . . ?
C5 C6 C1 122.46(11) . . ?
C5 C6 H6 118.8 . . ?
C1 C6 H6 118.8 . . ?
O3 C7 O2 123.42(11) . . ?
O3 C7 C1 119.22(12) . . ?
O2 C7 C1 117.35(11) . . ?
C8 N2 C11 111.36(10) . . ?
C8 N2 H13 106.1(12) . . ?
C11 N2 H13 112.9(12) . . ?
C9 N3 C10 110.21(10) . . ?
C9 N3 H15 108.4(11) . . ?
C10 N3 H15 110.3(11) . . ?
C9 N3 H14 110.2(11) . . ?
C10 N3 H14 109.8(11) . . ?
H15 N3 H14 107.9(14) . . ?
N2 C8 C9 112.80(11) . . ?
N2 C8 H8A 109.0 . . ?
C9 C8 H8A 109.0 . . ?
N2 C8 H8B 109.0 . . ?
C9 C8 H8B 109.0 . . ?
H8A C8 H8B 107.8 . . ?
N3 C9 C8 109.00(10) . . ?
N3 C9 H9A 109.9 . . ?
C8 C9 H9A 109.9 . . ?
N3 C9 H9B 109.9 . . ?
C8 C9 H9B 109.9 . . ?
H9A C9 H9B 108.3 . . ?
N3 C10 C11 109.72(11) . . ?
N3 C10 H10A 109.7 . . ?
C11 C10 H10A 109.7 . . ?
N3 C10 H10B 109.7 . . ?
C11 C10 H10B 109.7 . . ?
H10A C10 H10B 108.2 . . ?
N2 C11 C10 114.44(11) . . ?
N2 C11 H11A 108.7 . . ?
C10 C11 H11A 108.7 . . ?
N2 C11 H11B 108.7 . . ?
C10 C11 H11B 108.7 . . ?
H11A C11 H11B 107.6 . . ?

loop_
_geom_torsion_atom_site_label_1
_geom_torsion_atom_site_label_2
_geom_torsion_atom_site_label_3
_geom_torsion_atom_site_label_4
_geom_torsion
_geom_torsion_site_symmetry_1
_geom_torsion_site_symmetry_2
_geom_torsion_site_symmetry_3
_geom_torsion_site_symmetry_4
_geom_torsion_publ_flag
C6 C1 C2 O1 -179.14(11) . . . . ?
C7 C1 C2 O1 1.31(19) . . . . ?
C6 C1 C2 C3 0.58(18) . . . . ?
C7 C1 C2 C3 -178.97(11) . . . . ?
O1 C2 C3 C4 -179.79(12) . . . . ?
C1 C2 C3 C4 0.5(2) . . . . ?
C2 C3 C4 N1 178.84(12) . . . . ?
C2 C3 C4 C5 -1.00(19) . . . . ?
N1 C4 C5 C6 -179.38(13) . . . . ?
C3 C4 C5 C6 0.46(19) . . . . ?
C4 C5 C6 C1 0.6(2) . . . . ?
C2 C1 C6 C5 -1.14(18) . . . . ?
C7 C1 C6 C5 178.41(12) . . . . ?
C6 C1 C7 O3 0.20(18) . . . . ?
C2 C1 C7 O3 179.74(11) . . . . ?
C6 C1 C7 O2 -178.55(11) . . . . ?
C2 C1 C7 O2 0.98(18) . . . . ?
C11 N2 C8 C9 52.66(16) . . . . ?
C10 N3 C9 C8 59.65(14) . . . . ?
N2 C8 C9 N3 -57.76(15) . . . . ?
C9 N3 C10 C11 -57.16(15) . . . . ?
C8 N2 C11 C10 -50.57(16) . . . . ?
N3 C10 C11 N2 53.01(16) . . . . ?

_diffrn_measured_fraction_theta_max 0.992
_diffrn_reflns_theta_full        30.66
_diffrn_measured_fraction_theta_full 0.992
_refine_diff_density_max         0.444
_refine_diff_density_min         -0.191
_refine_diff_density_rms         0.050
